# Supplementary material for: Short-Chain Fatty Acids Promote Intracellular Bactericidal Activity in Head Kidney Macrophages From Turbot (Scophthalmus maximus L.) via Hypoxia Inducible Factor-1α
Source: PubMed Central journal article supplement (PMC7785818; doi:10.3389/fimmu.2020.615536), 2020-12-23
Supplement: DataSheet_1.pdf [file DataSheet_1.pdf]

**A**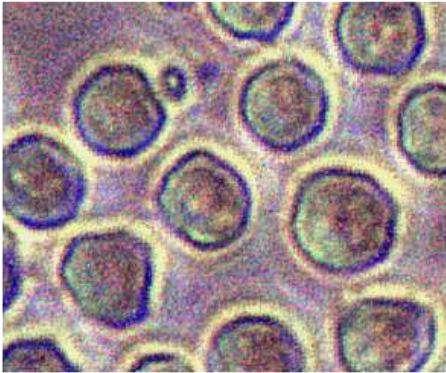**B**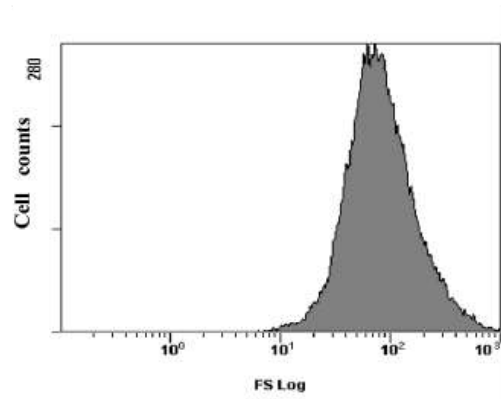**C**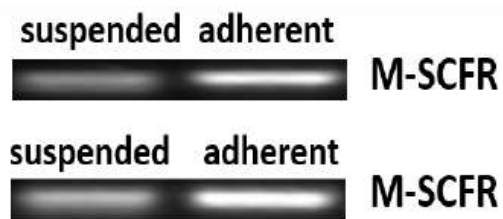

**Supplemental Figure 1. The morphology and characterization of HKMs. (A-B)** The adherent monolayer was examined by Giemsa staining (A) or analyzed by flow cytometry (B). (C) The non-adherent and adherent cells were collected respectively, and the gene expression of macrophage colony-stimulating factor receptor (M-CSFR) in two groups was detected by PCR. The figure was representative of at least three independent experiments.
